# Supplementary material
Source: ML conference proceedings conference paper supplement (https://openreview.net/forum?id=SU3lZ8jrRD)

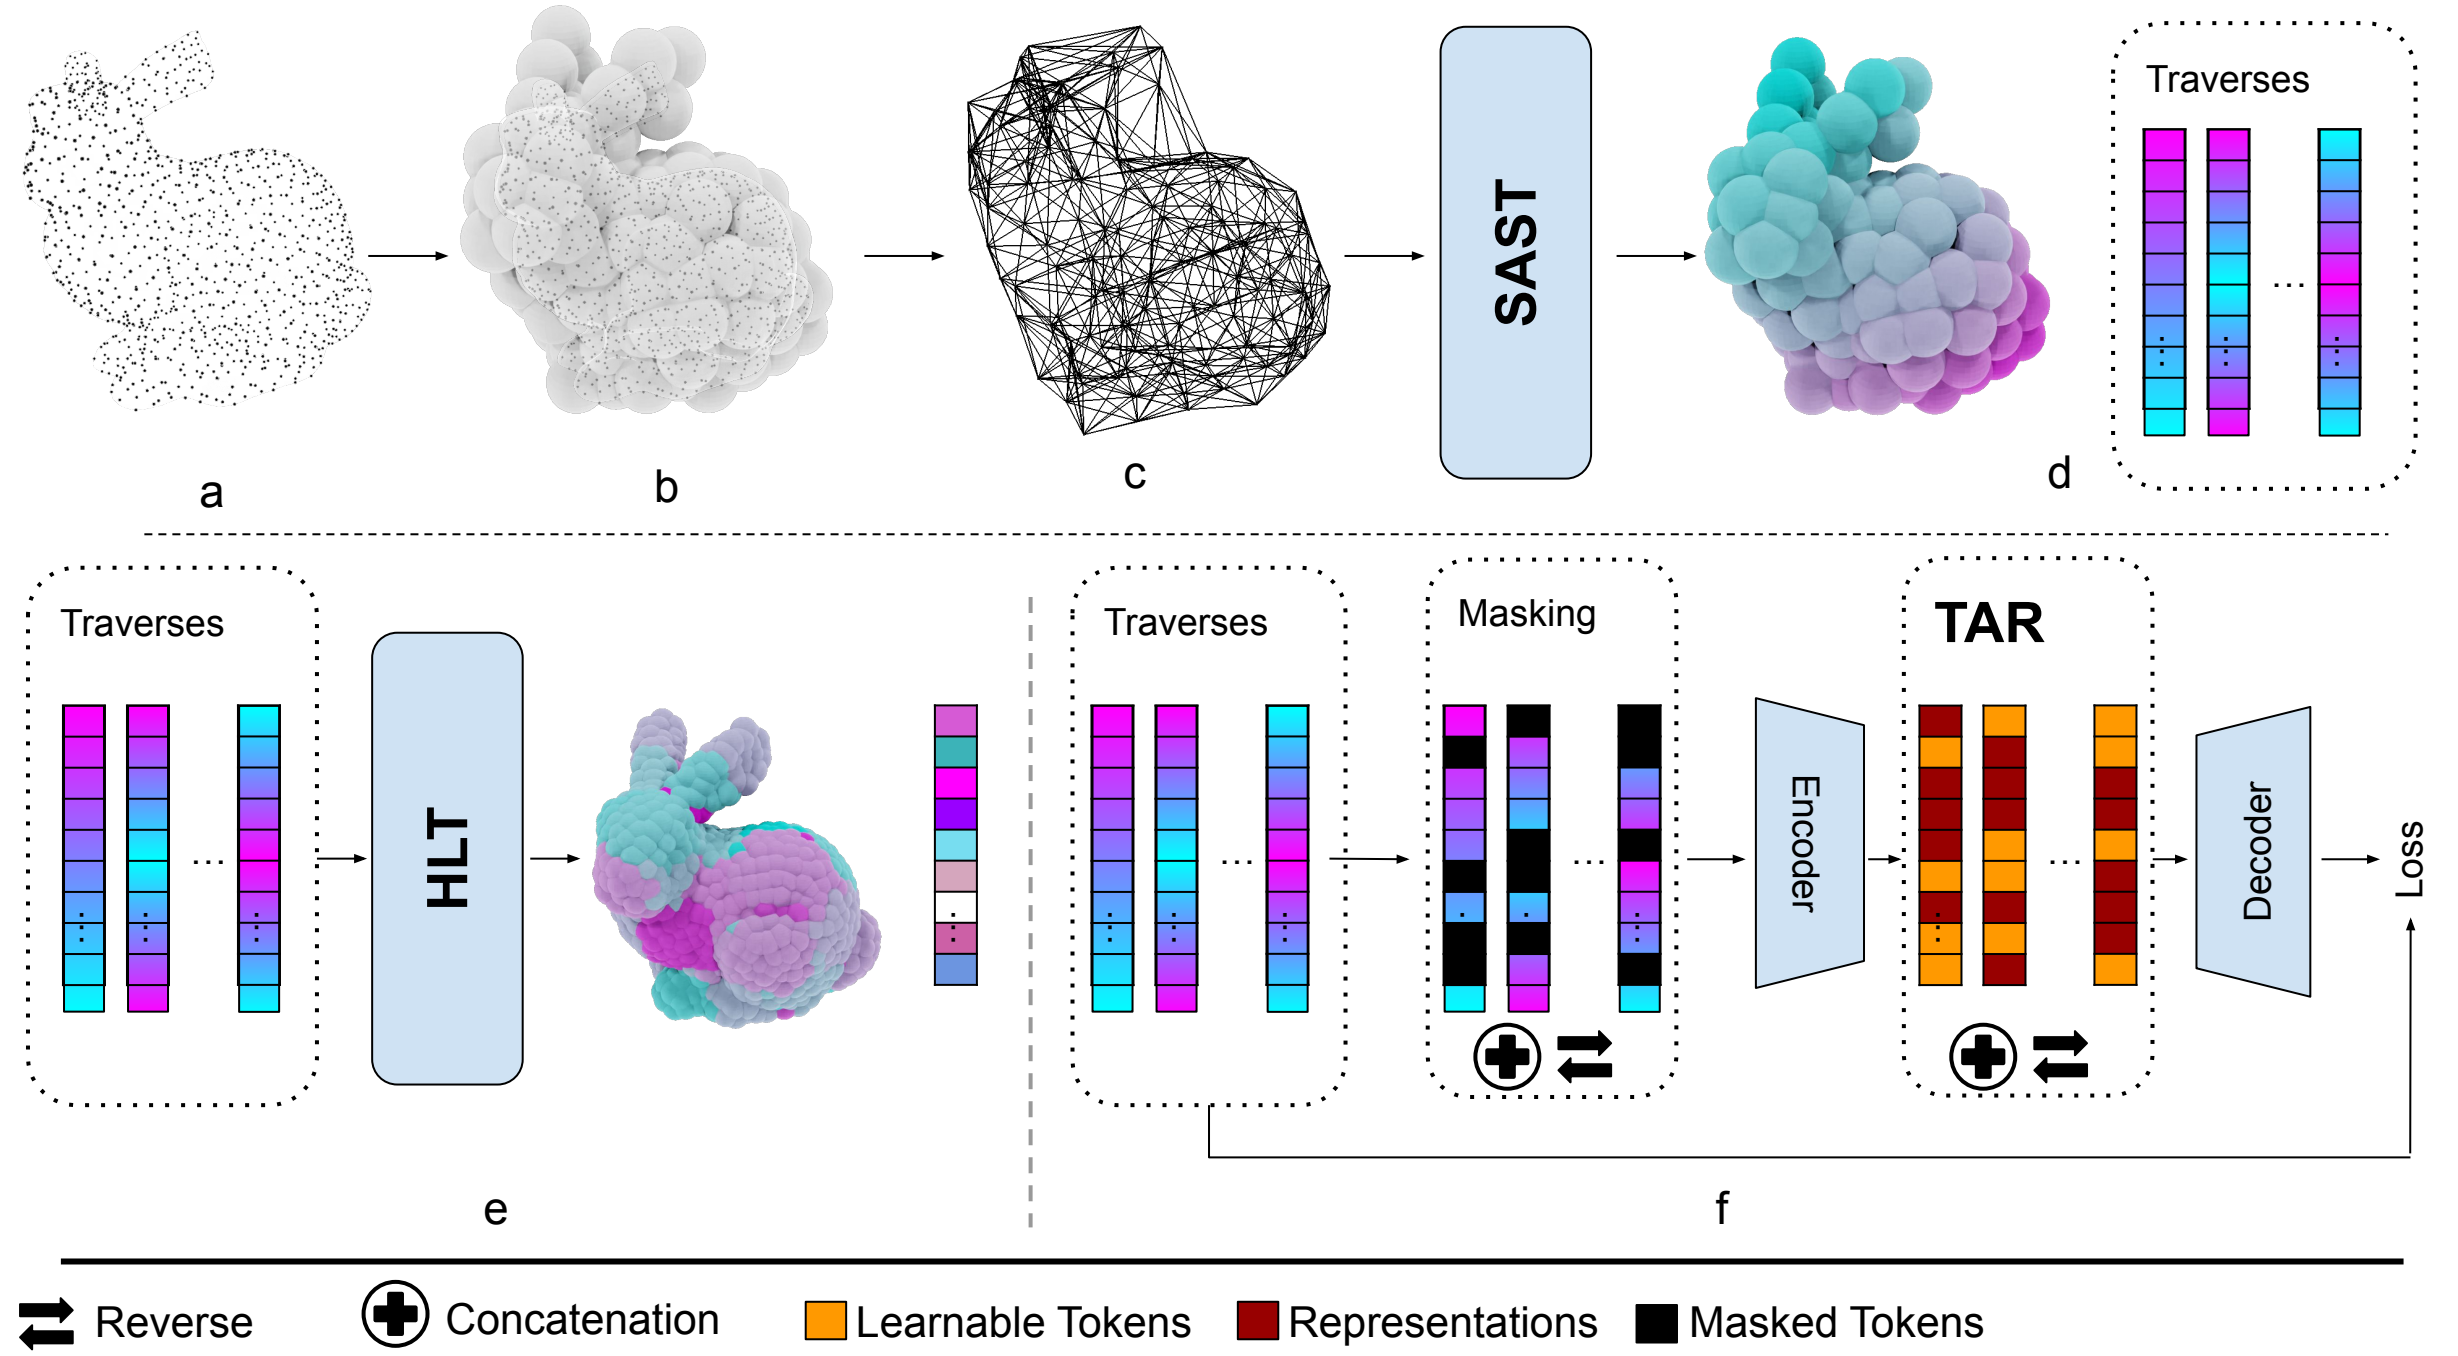

Supplement: supplementary_material [file attachment]

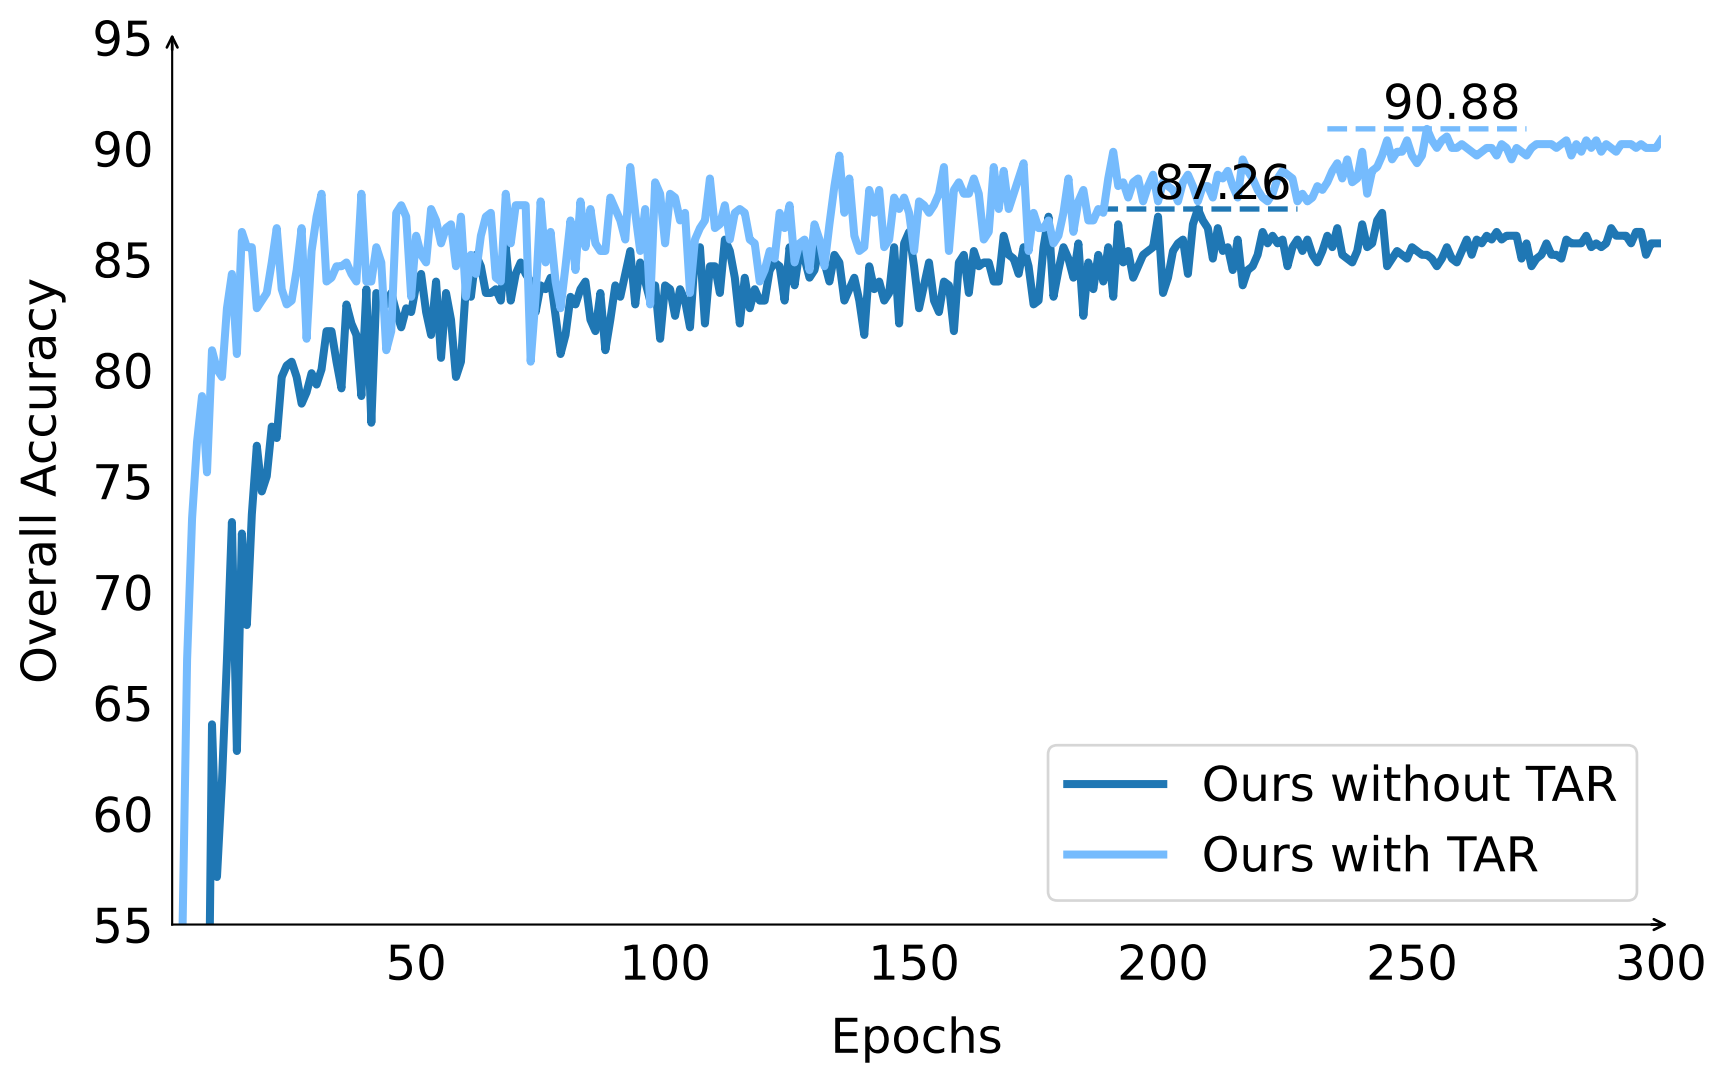

Supplement: supplementary_material [file attachment]

Accuracy vs Epochs for Different Models

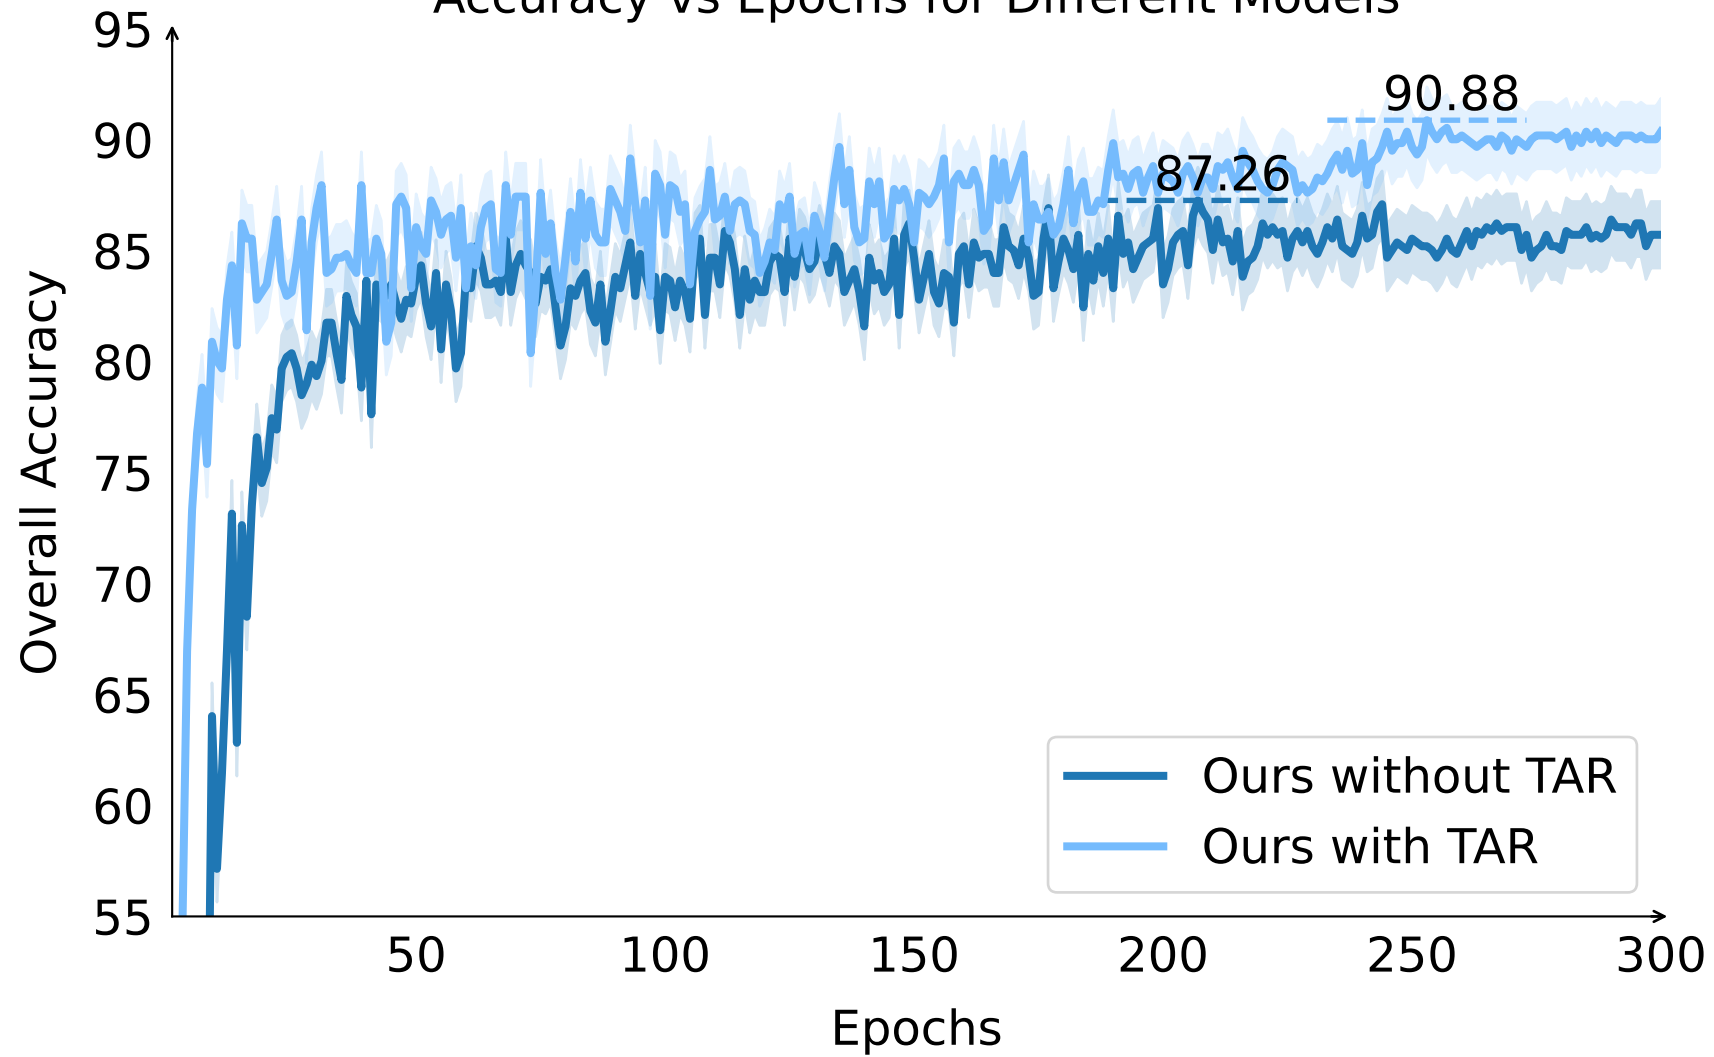

Supplement: supplementary_material [file attachment]

# Accuracy vs Epochs for Different Models

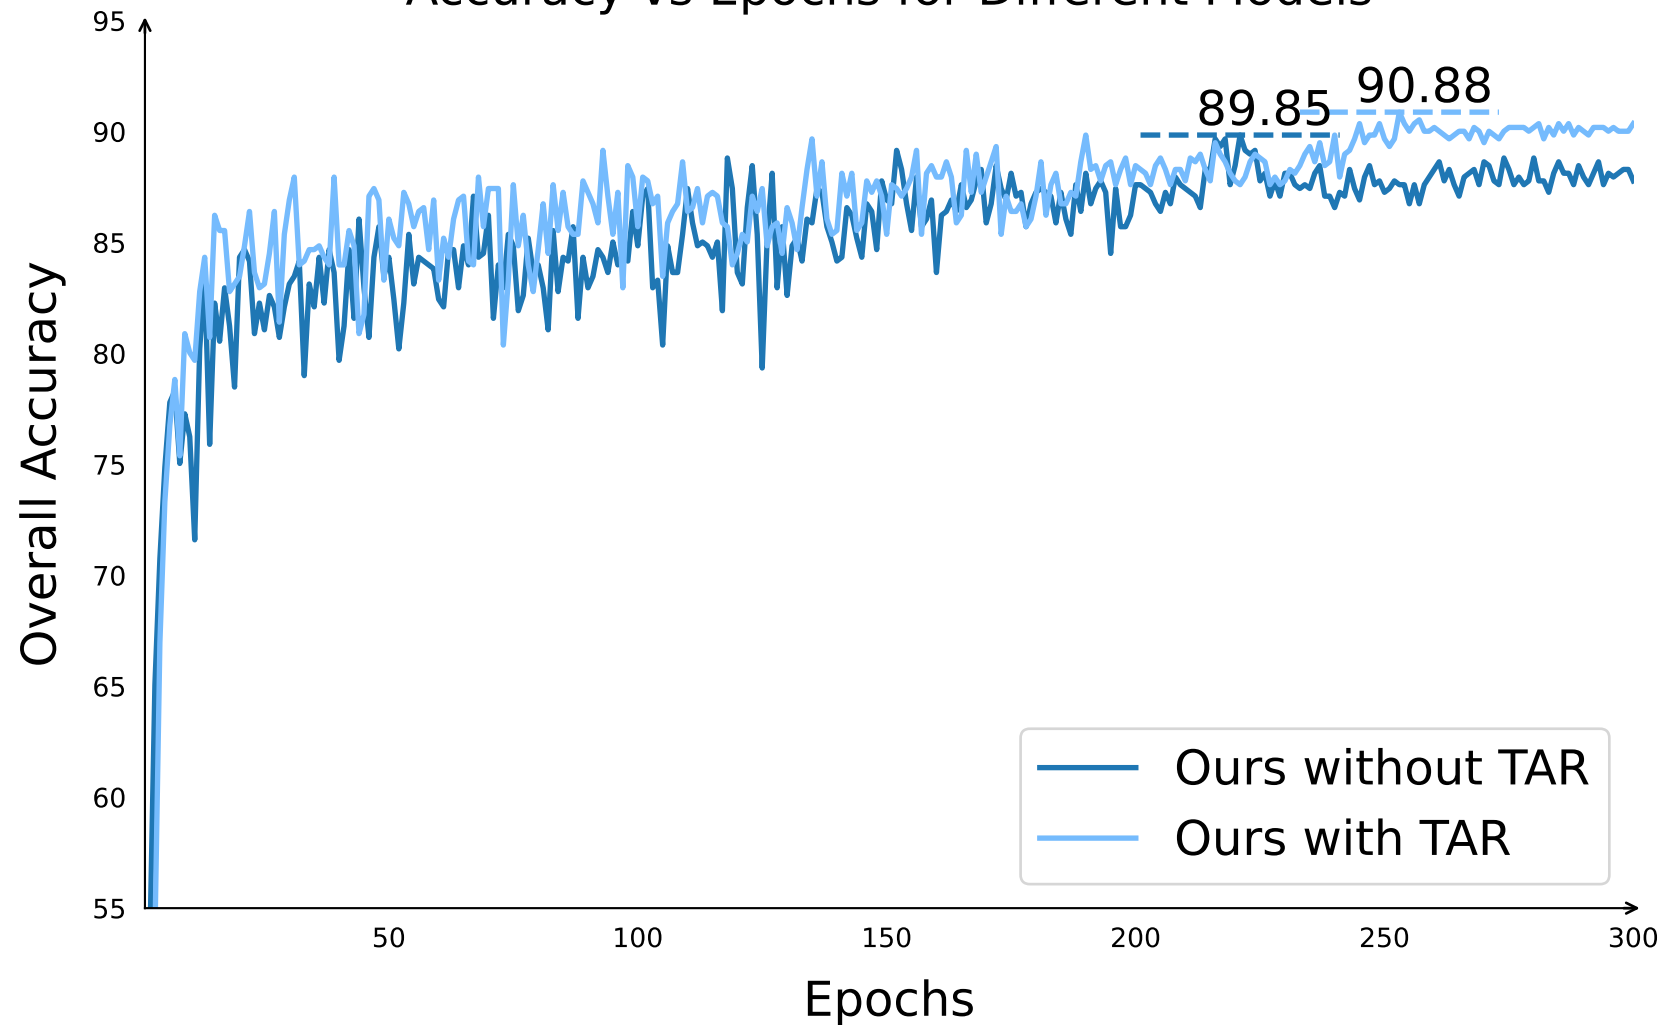

Supplement: supplementary_material [file attachment]

# Accuracy vs Epochs for Different Models

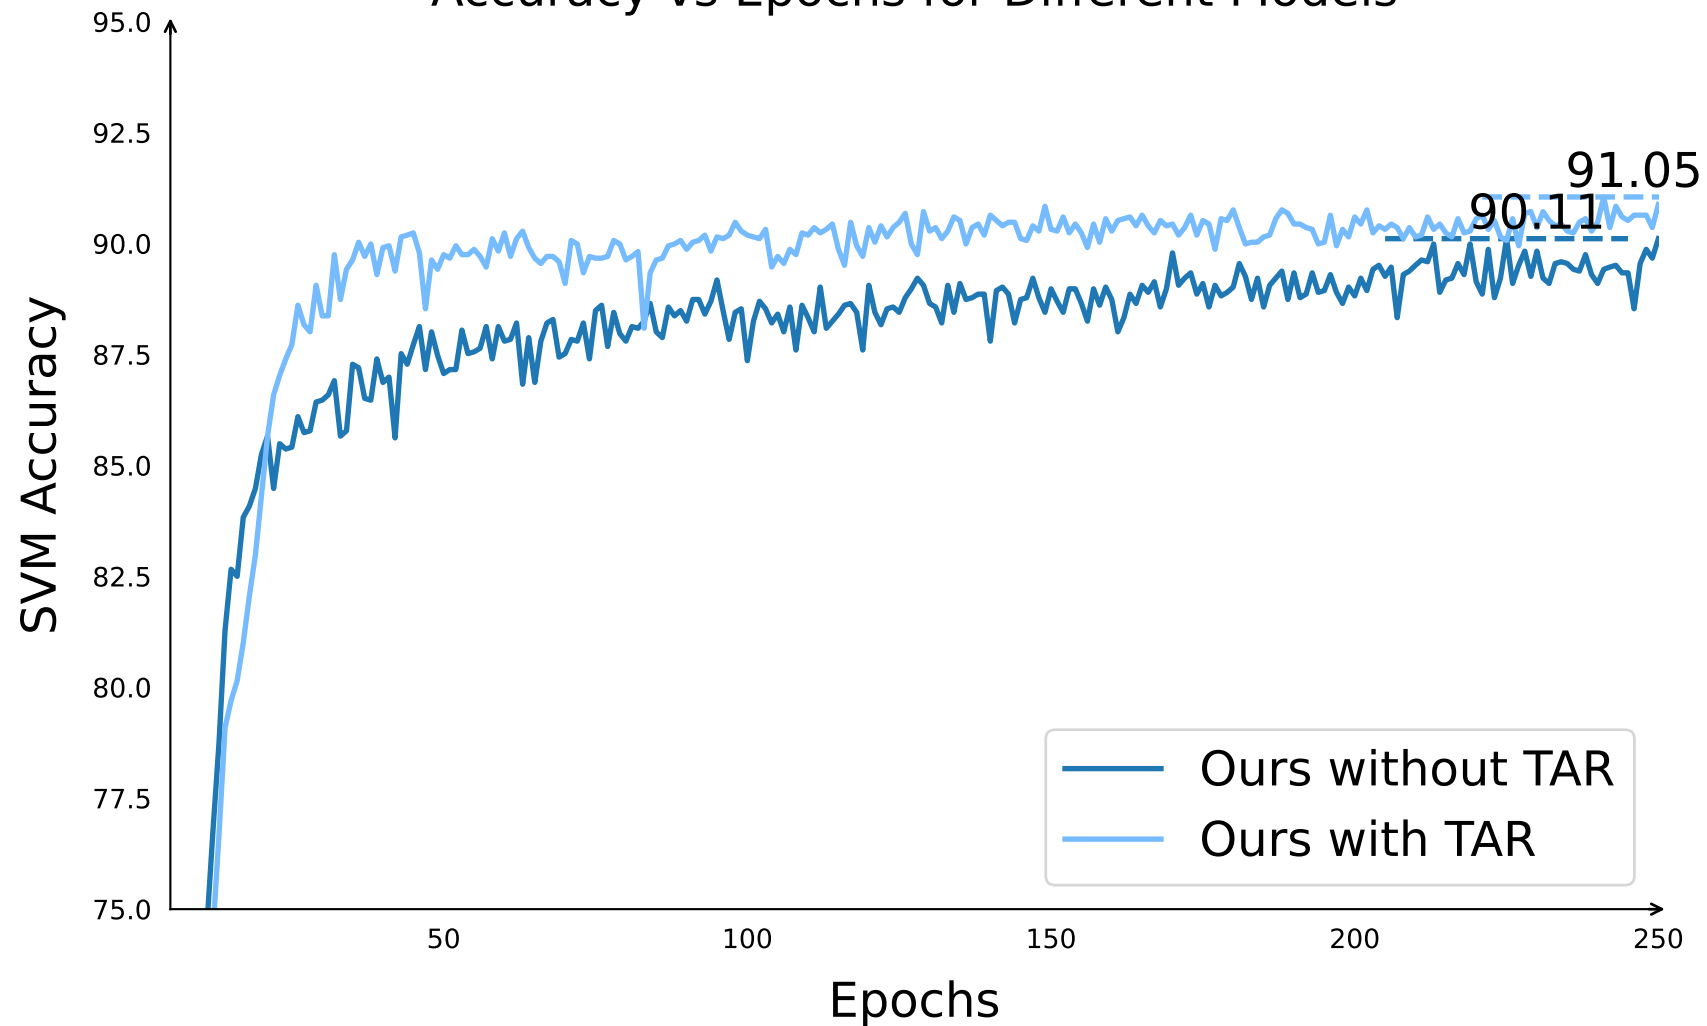

Supplement: supplementary_material [file attachment]

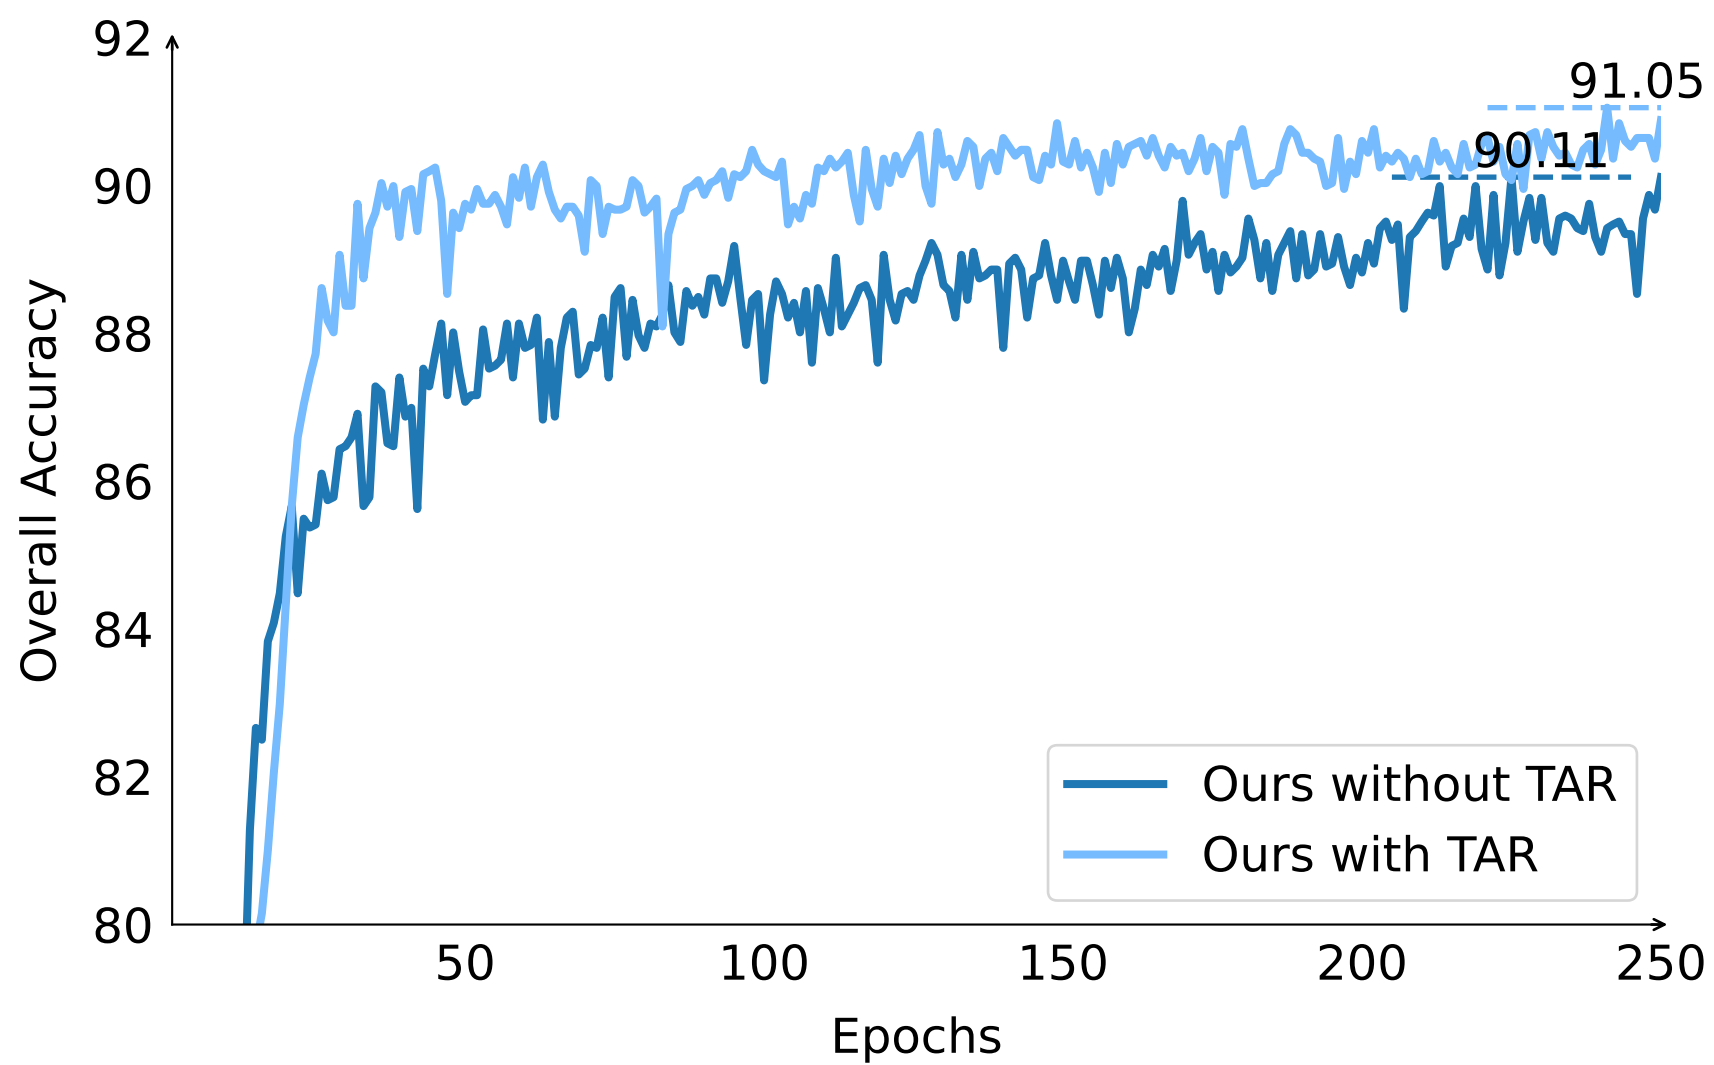

Supplement: supplementary_material [file attachment]
